# Supplementary material
Source: Springer Nature journal article supplement (https://www.springermedizin.de/resource/supplementary/12879_2011_1692_MOESM2_ESM.pdf/9443370)

**A)****sRAGE**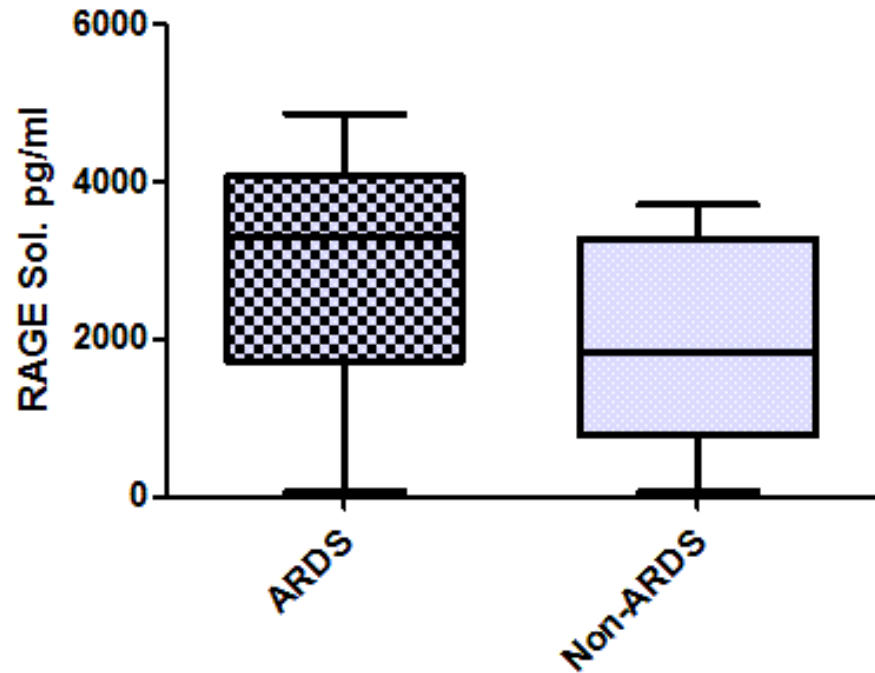**B)****SOFA**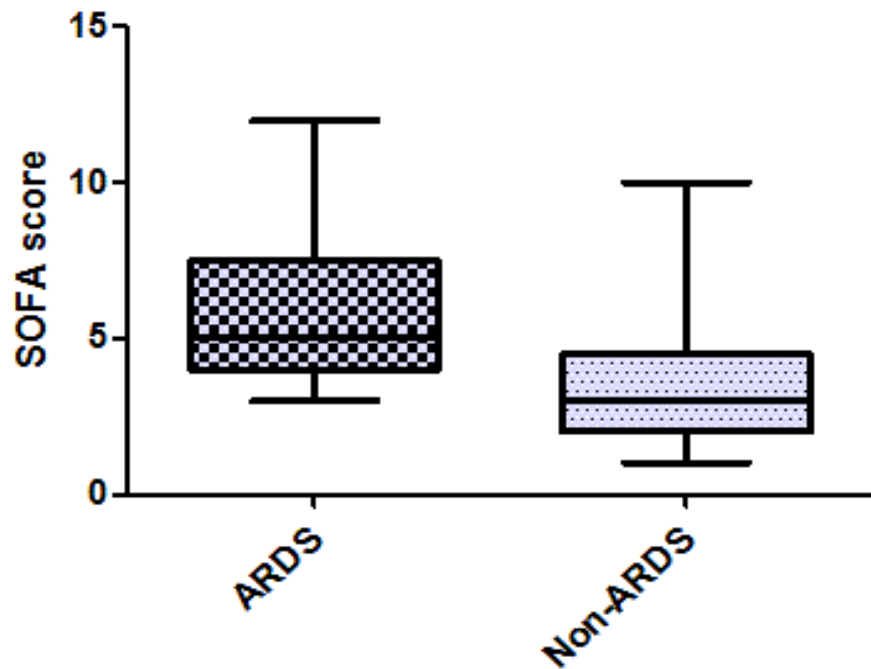

Supplement: MOESM2 [file 9443370]
